# Supplementary material for: Biobased sunscreen fabrication using Zn-porphyrins from engineered Corynebacterium glutamicum
Source: Royal Society of Chemistry journal article supplement (doi:10.1039/d3gc00888f), 2023-01-01
Supplement: d3gc00888f1.pdf [file d3gc00888f1.pdf]

**Title: Biobased sunscreen fabrication using Zn-porphyrins from engineered  
*Corynebacterium glutamicum***

**Authors:**

Young Jin Ko <sup>a,b</sup>, Jeong-Joo Oh <sup>c</sup> and Sung Ok Han <sup>a,b,\*</sup>

**Affiliations**

<sup>a</sup> Department of Biotechnology, Korea University, Seoul 02841, Republic of Korea

<sup>b</sup> Institute of Life Science and Natural Resources, Korea University, Seoul 02841, Korea

<sup>c</sup> Division of Environmental Science & Ecological Engineering, Korea University, Seoul 02841,  
Korea

\* Corresponding author:

Email address: [samhan@korea.ac.kr](mailto:samhan@korea.ac.kr)

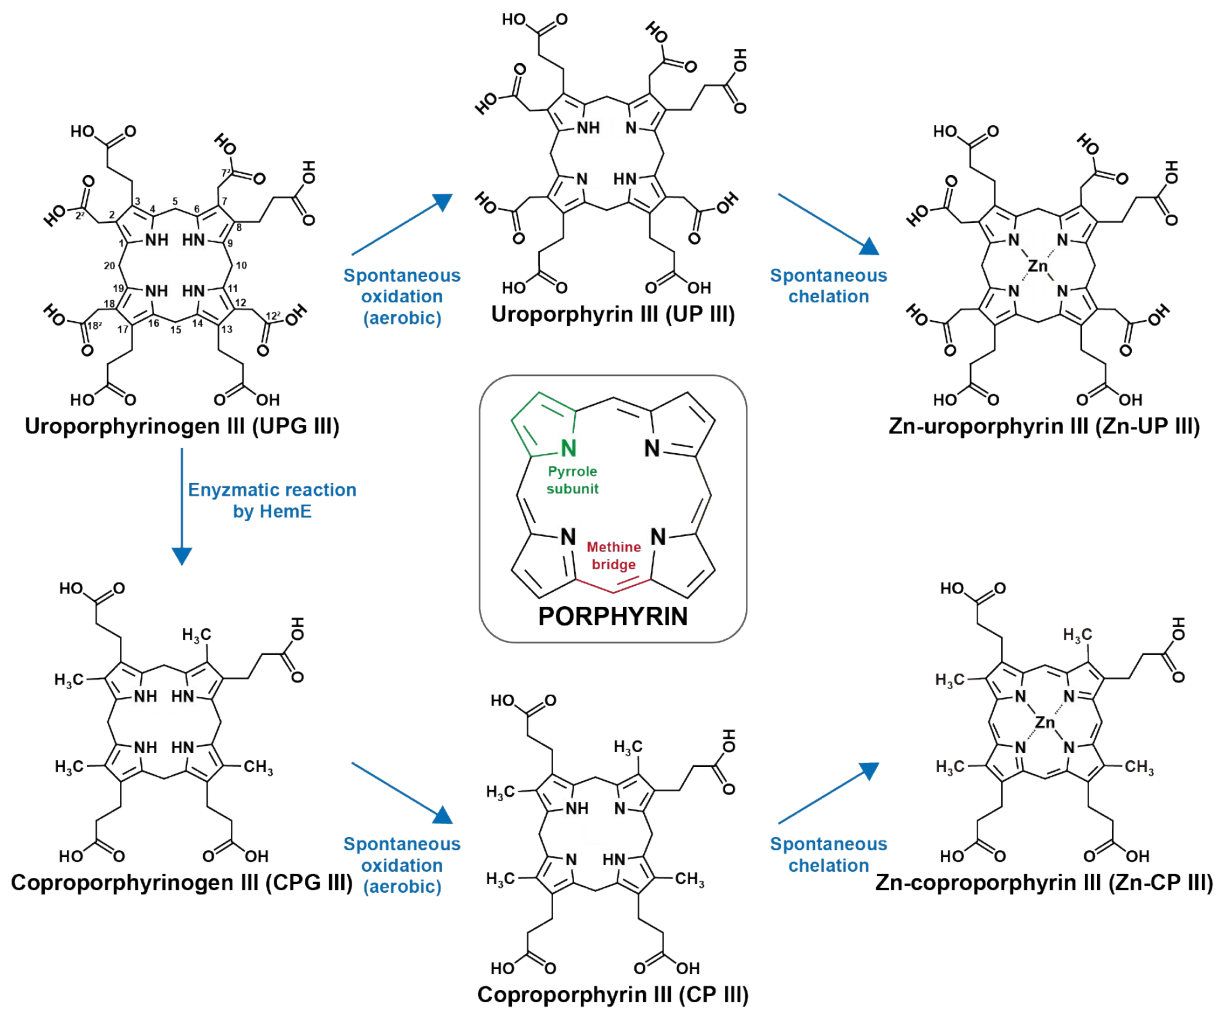

**Fig. S1** Chemical structures of porphyrins including UPG III, CPG III, UP III, CP III, Zn-UP III, and Zn-CP III.

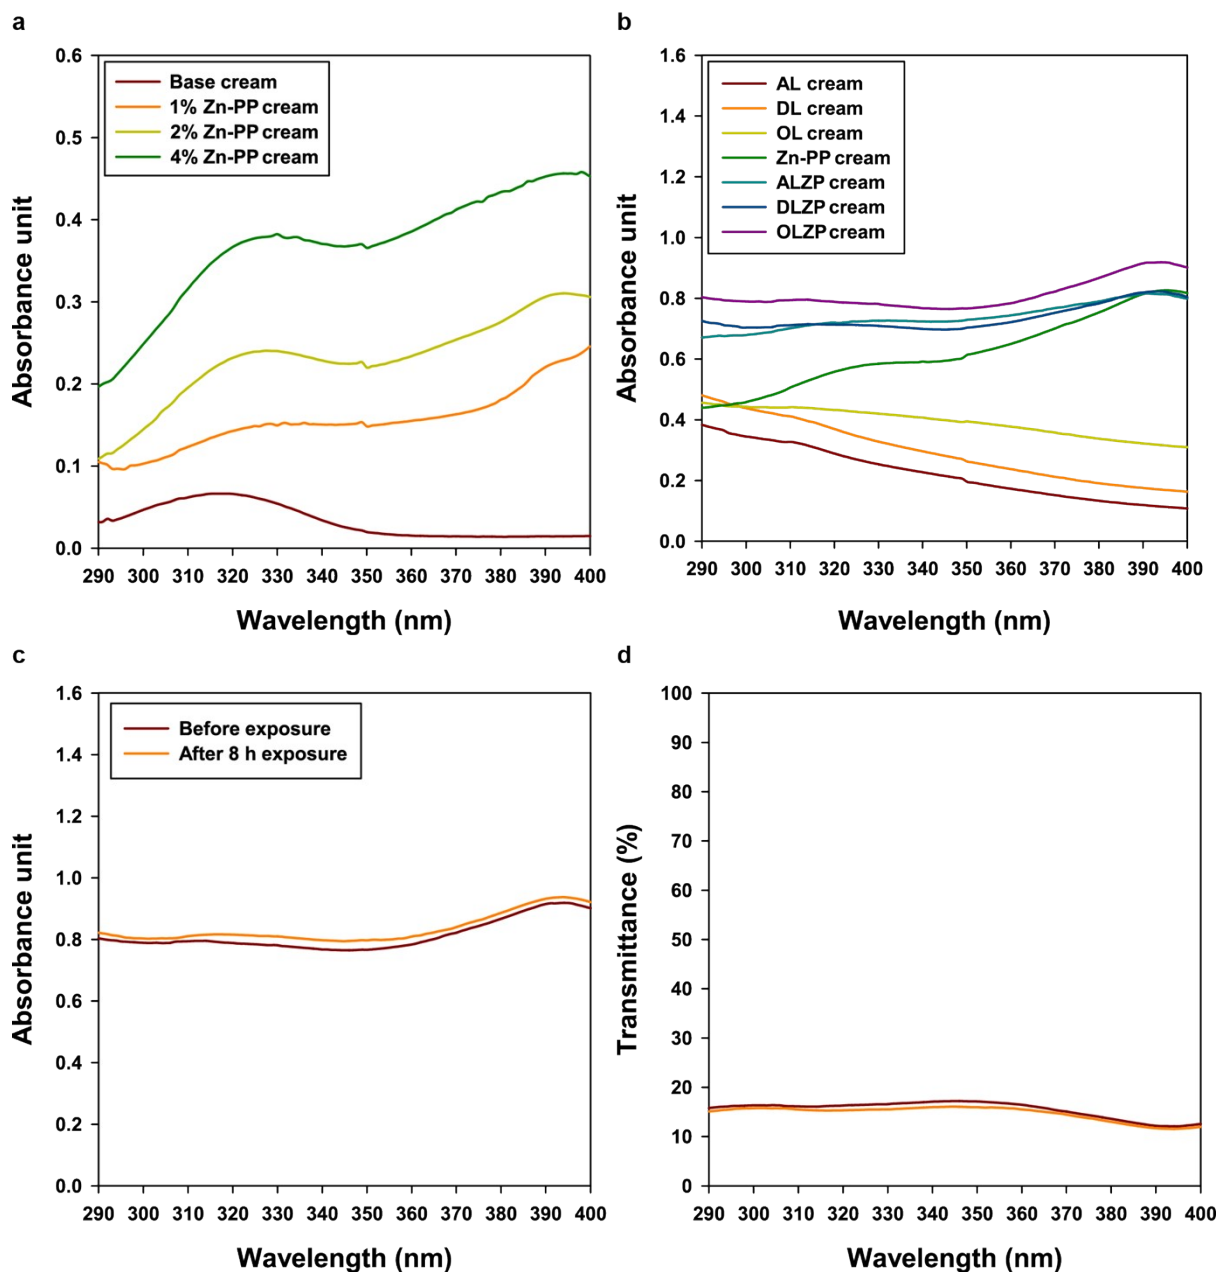

**Fig. S2** Sunscreen performance of the creams including Zn-PPs and/or several lignins against UV light. (a) UV absorbance (290 nm to 400 nm) of the creams containing 1, 2, and 4% Zn-PPs were measured. (b) UV absorbance of the creams containing 4% each lignin, such as AL, DL, and OL, and/or 4% Zn-PPs were measured. (c) UV absorbance and (d) transmittance of the creams containing 4% OL and Zn-PPs were measured before or after 8 h UV exposure. The experiments were conducted three times.

**Table S1** Plasmids and strains constructed in this study.

| Plasmids and Strains            | Characteristics                                                                                                                                                                                                                      | Reference  |
|---------------------------------|--------------------------------------------------------------------------------------------------------------------------------------------------------------------------------------------------------------------------------------|------------|
| <b>Plasmid</b>                  |                                                                                                                                                                                                                                      |            |
| pEKEx2                          | <i>C. glutamicum</i> - <i>E. coli</i> shuttle vector, P <sub>tac</sub> , lacI, Kan <sup>R</sup> , pBL1 ori                                                                                                                           | Lab stock  |
| pEKEx2::ALDt                    | pEKEx2 carrying <i>hemA<sup>M</sup></i> , <i>hemL</i> , and <i>dtxR</i> genes                                                                                                                                                        | 1          |
| pEKEx2::ALSDtE                  | pEKEx2 carrying <i>hemA<sup>M</sup></i> , <i>hemL</i> , <i>alaS</i> , <i>dtxR</i> , and <i>hemE</i> genes                                                                                                                            | 2          |
| pMTC                            | <i>C. glutamicum</i> - <i>E. coli</i> shuttle vector, P <sub>tac</sub> , Amp <sup>R</sup> , CmR <sup>R</sup> , pCG1 ori                                                                                                              | Lab stock  |
| pMTC-HrtBA                      | pMTC carrying <i>hrtB</i> and <i>hrtA</i> genes from <i>C. glutamicum</i>                                                                                                                                                            | This study |
| <b>Strains</b>                  |                                                                                                                                                                                                                                      |            |
| <i>E. coli</i> DH5α             | F <sup>-</sup> , <i>deoR</i> , <i>endA1</i> , <i>gyrA96</i> , <i>hsdR17</i> (rk <sup>-</sup> mk <sup>+</sup> ), <i>recA1</i> , <i>relA1</i> , <i>supE44</i> , <i>thi-1</i> , Δ( <i>lacZYA-argF</i> )U169, (Phi80 <i>lacZ</i> delM15) | Invitrogen |
| <i>C. glutamicum</i> ATCC 14067 | L-glutamate producing strain                                                                                                                                                                                                         | ATCC       |
| ALDt-c                          | <i>C. glutamicum</i> ATCC 14067 harboring pEKEx2::ALDt and pMTC                                                                                                                                                                      | This study |
| ALDt-Hr                         | <i>C. glutamicum</i> ATCC 14067 harboring pEKEx2::ALDt and pMTC-HrtBA                                                                                                                                                                | This study |
| ALSDtE-c                        | <i>C. glutamicum</i> ATCC 14067, harboring pEKEx2::ALSDtE and pMTC                                                                                                                                                                   | This study |
| ALSDtE-BA                       | <i>C. glutamicum</i> ATCC 14067, harboring pEKEx2::ALSDtE and pMTC-HrtBA                                                                                                                                                             | This study |

**Table S2** The contents of UP III, CP III, Zn-UP III, and Zn-CP III in the supernatant of each fermentation or purification sample.

| Strain<br>(Condition)                                  | Content (%) |        |                   |            |
|--------------------------------------------------------|-------------|--------|-------------------|------------|
|                                                        | UP III      | CP III | Zn-UP III         | Zn-CP III  |
| ALSDtE-c<br>(Flask)                                    | 19.5%       | 80.5%  | N.D. <sup>a</sup> | N.D.       |
| ALSDtE-Hr<br>(Flask)                                   | 28.6%       | 71.4%  | N.D.              | N.D.       |
| ALSDtE-c<br>(Flask with ETB10 and ZnSO <sub>4</sub> )  | N.D.        | N.D.   | 21.5%             | 78.5%      |
| ALSDtE-Hr<br>(Flask with ETB10 and ZnSO <sub>4</sub> ) | N.D.        | N.D.   | 64.2%             | 35.8%      |
| ALSDtE-c<br>(Flask with ETB25 and ZnSO <sub>4</sub> )  | N.D.        | N.D.   | 24.6%             | 75.4       |
| ALSDtE-c<br>(Flask with ETB50 and ZnSO <sub>4</sub> )  | N.D.        | N.D.   | 25.6%             | 74.4       |
| ALSDtE-c<br>(Flask with ETB100 and ZnSO <sub>4</sub> ) | N.D.        | N.D.   | 25.6%             | 74.4%      |
| ALSDtE-c<br>(Fed-batch)                                | N.D.        | N.D.   | 28.9%             | 71.1%      |
| ALSDtE-c<br>(Fed-batch with ETB)                       | N.D.        | N.D.   | 77.6%             | 22.4%      |
| ALSDtE-c<br>(Purified from fed-batch)                  | N.D.        | N.D.   | 29.8%             | 70.2%      |
| <sup>a</sup>                                           | N.D.        | means  | "not              | detected". |

**Table S3** The molecular weights of the lignins used in this study.

| <b>Lignins</b>                | <b>Number average<br/>molecular weight<br/>(Mn)</b> | <b>weight average<br/>molecular weight<br/>(Mw)</b> |
|-------------------------------|-----------------------------------------------------|-----------------------------------------------------|
| <b>Alkaline lignin (AL)</b>   | 6478                                                | 12097                                               |
| <b>Delkaline lignin (DL)</b>  | 7471                                                | 19917                                               |
| <b>Organosolv lignin (OL)</b> | 10057                                               | 22753                                               |

**Table S4** The *in vitro* SPF value of OLZP at 0 h and after 8 h.

| Cream | SPF (0 h)   | SPF (8 h)   |
|-------|-------------|-------------|
| OLZP  | 6.21 ± 0.69 | 6.47 ± 0.55 |

## References

1. Y. J. Ko, Y. C. Joo, J. E. Hyeon, E. Lee, M. E. Lee, J. Seok, S. W. Kim, C. Park and S. O. Han, *Sci. Rep.*, 2018, **8**.
2. Y. J. Ko, M. Kim, S. K. You, S. K. Shin, J. Chang, H. J. Choi, W. Y. Jeong, M. E. Lee, D. H. Hwang and S. O. Han, *Metab. Eng.*, 2021, **66**, 217-228.
